# Supplementary material for: Both layered trihydroxide hollow cubes and bismuth oxide derived from MOF templates for high-performance alkaline batteries
Source: Royal Society of Chemistry journal article supplement (doi:10.1039/d3qi00962a), 2023-01-01
Supplement: d3qi00962a1.pdf [file d3qi00962a1.pdf]

## Supporting information

### **Both Layered Trihydroxide Hollowcube and Bismuth Oxide Derived from MOF Templates for High-performance Alkaline Battery**

*Jianwei Wang,<sup>\*a</sup> Wenhui Wang,<sup>a</sup> Huan Wang,<sup>a</sup> Wenlin Zhang,<sup>a</sup> Yanzhong Zhen,<sup>a</sup> Feng Fu,<sup>\*a</sup> and Bin Xu<sup>\*a,b</sup>*

[a] J. Wang, W. Wang, H. Wang, W. Zhang, Y. Zhen, F. Fu, B. Xu

School of Chemistry & Chemical Engineering, Yan'an University

Yan'an 716000, Shaanxi (P.R. China)

E-mail: wangjianwei@yau.edu.cn; fufeng@yau.edu.cn

[b] B. Xu

State Key Laboratory of Organic-Inorganic Composites

Beijing Key Laboratory of Electrochemical Process and Technology for Materials

College of Materials Science and Engineering, Beijing University of Chemical Technology

Beijing 100029, (P.R. China)

E-mail: xubin@mail.buct.edu.cn

\* Corresponding Authors.

## Table of Contents

|                                                                                      |    |
|--------------------------------------------------------------------------------------|----|
| Calculation method .....                                                             | 3  |
| N <sub>2</sub> adsorption–desorption isotherms and pore size distribution plot ..... | 4  |
| XPS spectra .....                                                                    | 4  |
| Morphology characterization .....                                                    | 6  |
| EIS fitting results.....                                                             | 7  |
| CV profiles .....                                                                    | 7  |
| Nyquist plots .....                                                                  | 8  |
| Ragone Comparison table .....                                                        | 9  |
| References .....                                                                     | 10 |

**Calculation method:** Specific capacity <sup>1-3</sup> ( $C_m$ , mAh g<sup>-1</sup>) of the electrode materials and CoNiMn-LDH//Bi<sub>2</sub>O<sub>3</sub> battery is reckoned as follows:

$$C_m = \frac{\int_0^t I dt}{m_c}$$

Where  $t$ ,  $m_c$  and  $I$  are the discharge time (s), mass loading (g) and discharge current (A), severally. Energy density ( $E$ , Wh kg<sup>-1</sup>) and power density ( $P$ , W kg<sup>-1</sup>) of CoNiMn-LDH //Bi<sub>2</sub>O<sub>3</sub> battery are calculated as follows:

$$E = C_m \times \Delta V$$

$$P = \frac{E}{\Delta t}$$

Here,  $\Delta t$  (s) and  $\Delta V$  (V) are the discharging time and working potential.

## N<sub>2</sub> adsorption–desorption isotherms and pore size distribution plot

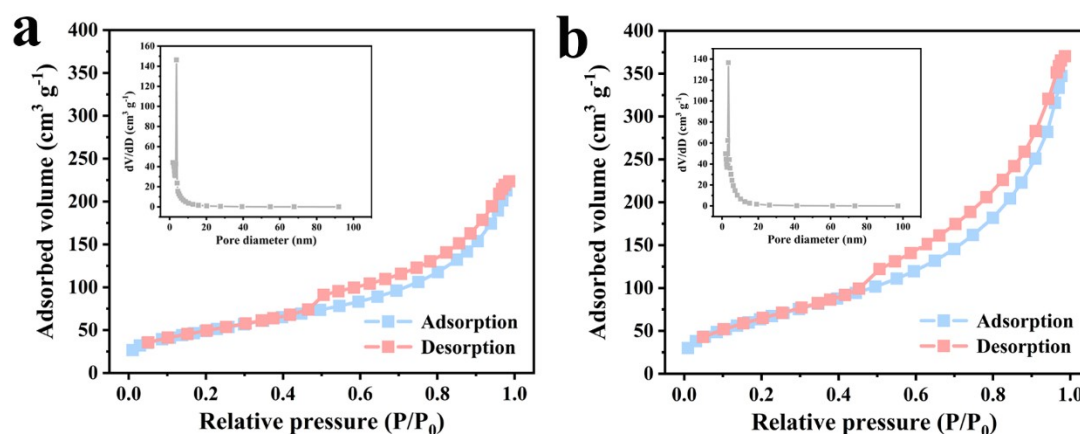

**Fig. S1.** (a) N<sub>2</sub> adsorption–desorption isotherms and pore size distribution plot for CoNi-LDH. (b) N<sub>2</sub> adsorption–desorption isotherms and pore size distribution plot for CoNiMn-LDH.

## XPS spectra

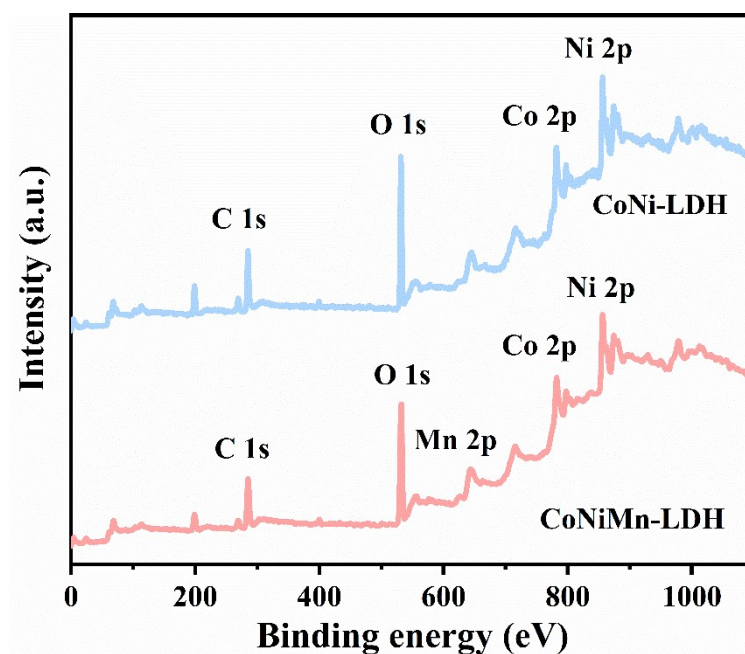

**Fig. S2.** The XPS survey of CoNi-LDH and CoNiMn-LDH.

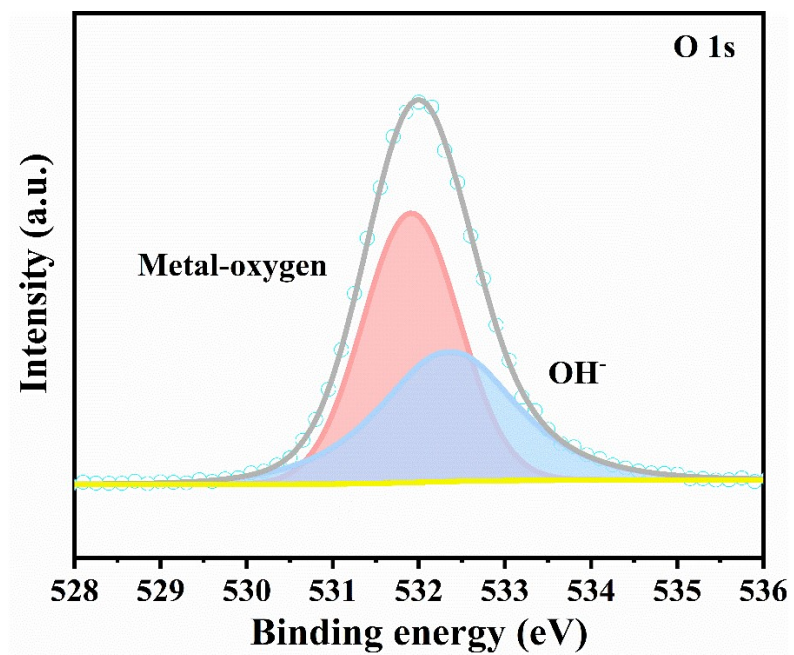

**Fig. S3.** High-resolution XPS spectra of the O 1s of CoNi-LDH.

## Morphology characterization

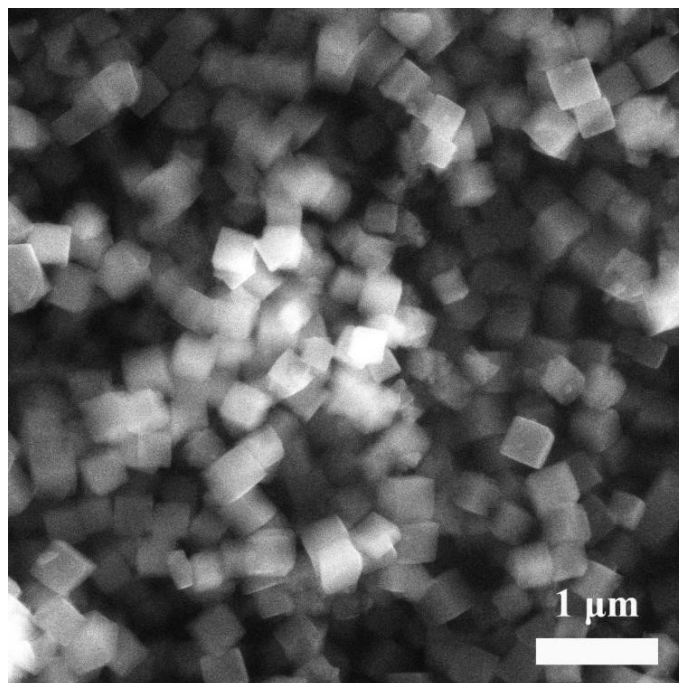

**Fig. S4.** SEM of ZIF-67.

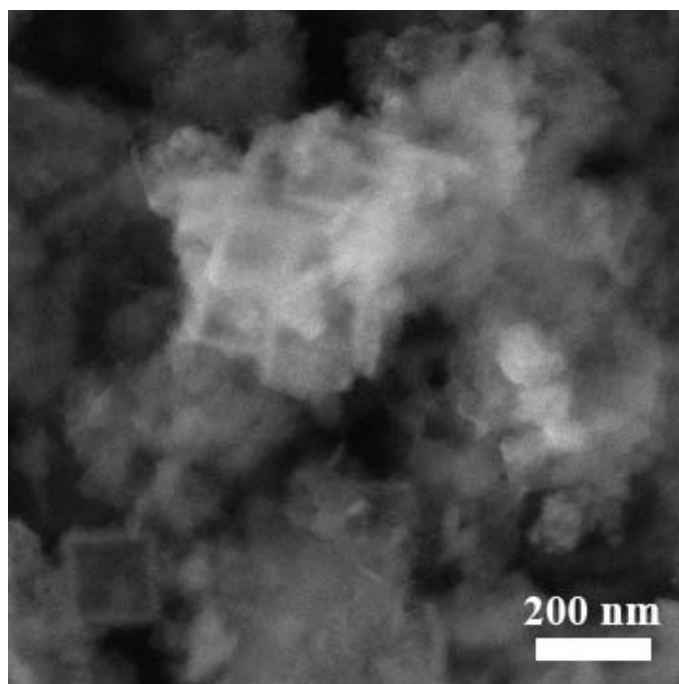

**Fig. S5.** SEM of CoNi-LDH under magnification.

## EIS fitting results

**Table. S1.** EIS fitting results of CoNi-LDH and CoNiMn-LDH

| Material   | $R_{ct}$ ( $\Omega$ ) | $R_s$ ( $\Omega$ ) |
|------------|-----------------------|--------------------|
| CoNi-LDH   | 6.783                 | 0.646              |
| CoNiMn-LDH | 4.407                 | 0.598              |

## CV profiles

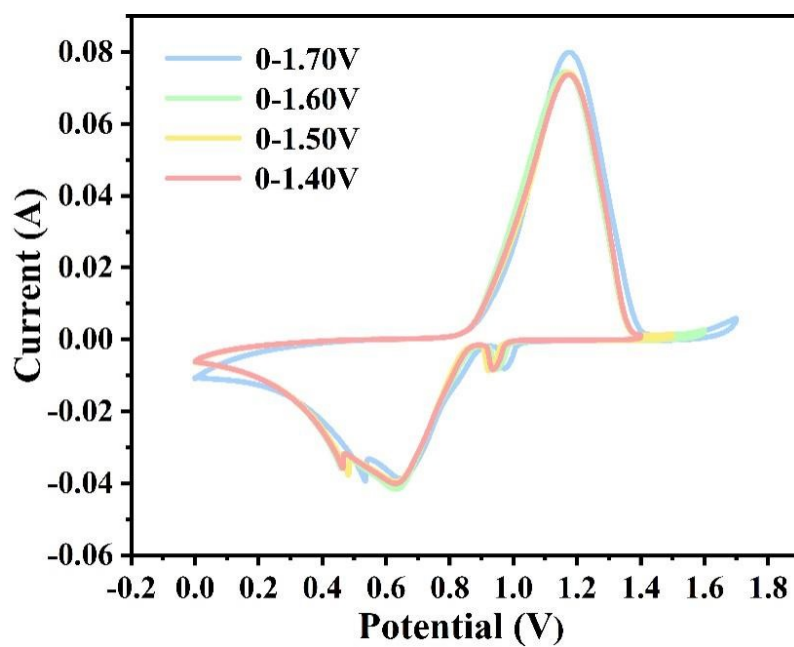

**Fig. S6.** Voltage window selection of the CoNiMn-LDH//Bi<sub>2</sub>O<sub>3</sub> full battery

## Nyquist plots

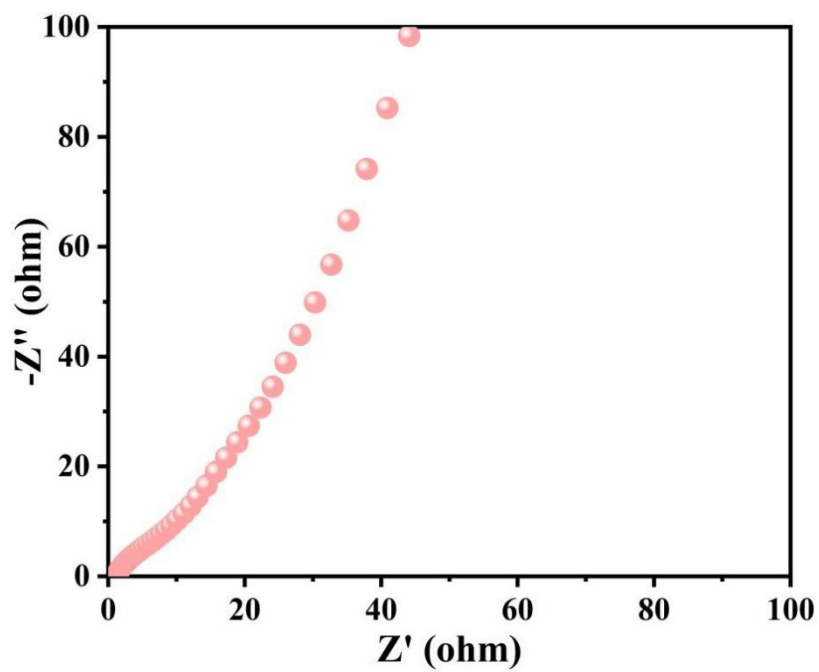

**Fig. S7.** EIS of the CoNiMn-LDH //  $\text{Bi}_2\text{O}_3$  full battery.



## Ragone Comparison table

**Table. S2.** Comparison of electrochemical performances of CoNiMn-LDH//Bi<sub>2</sub>O<sub>3</sub> in this work with other literature-reported energy storage devices

| Electrode materials                                      | Power density<br>(W kg <sup>-1</sup> ) | Energy density<br>(Wh kg <sup>-1</sup> ) | References |
|----------------------------------------------------------|----------------------------------------|------------------------------------------|------------|
| CoNiMn-LDH//Bi <sub>2</sub> O <sub>3</sub>               | 4219                                   | 120                                      | This work  |
| NiCo-B-S//AC                                             | 856                                    | 45                                       | 4          |
| LDH/NG-5//AC                                             | 354                                    | 31.2                                     | 5          |
| NiCo-LDH//AC                                             | 338                                    | 79.6                                     | 6          |
| NiMn-LDH//AC                                             | 1700                                   | 46.7                                     | 7          |
| NiCo <sub>2</sub> S <sub>4</sub> @NC//rGO                | 4000                                   | 30.7                                     | 8          |
| NiCSe <sub>2</sub> //HPC                                 | 400                                    | 34.8                                     | 9          |
| Ni/Ni(OH) <sub>2</sub> //AC                              | 530                                    | 23.45                                    | 10         |
| Ni <sub>x</sub> Co <sub>1-x</sub> (OH) <sub>2</sub> //AC | 348.9                                  | 21.9                                     | 11         |
| NiCo-LDH/10//CNT                                         | 649                                    | 36.1                                     | 12         |
| NiCoP/NiCo-OH//AC                                        | 775                                    | 34                                       | 13         |
| Y-doped Ni(OH) <sub>2</sub> //AC                         | 754.56                                 | 22                                       | 14         |

## References

1. J. S. Sanchez, Z. Xia, N. Patil, R. Grieco, J. Sun, U. Klement, R. Qiu, M. Christian, F. Liscio, V. Morandi, R. Marcilla and V. Palermo, All-Electrochemical Nanofabrication of Stacked Ternary Metal Sulfide/Graphene Electrodes for High-Performance Alkaline Batteries, *Small*, 2022, **18**, 2106403.
2. X. Zhao, R. Yu, H. Tang, D. Mao, J. Qi, B. Wang, Y. Zhang, H. Zhao, W. Hu and D. Wang, Formation of Septuple-Shelled  $(\text{Co}_{2/3}\text{Mn}_{1/3})(\text{Co}_{5/6}\text{Mn}_{1/6})_2\text{O}_4$  Hollow Spheres as Electrode Material for Alkaline Rechargeable Battery, *Advanced Materials*, 2017, **29**, 1700550.
3. K. Zhou, S. Wang, G. Zhong, J. Chen, Y. Bao and L. Niu, Hierarchical Heterostructure Engineering of Layered Double Hydroxides on Nickel Sulfides Heteronanowire Arrays as Efficient Cathode for Alkaline Aqueous Zinc Batteries, *Small*, 2022, **18**, 2202799.
4. Q. Wang, Y. Luo, R. Hou, S. Zaman, K. Qi, H. Liu, H. S. Park and B. Y. Xia, Redox Tuning in Crystalline and Electronic Structure of Bimetal-Organic Frameworks Derived Cobalt/Nickel Boride/Sulfide for Boosted Faradaic Capacitance, *Advanced Materials*, 2019, **31**, 1905744.
5. L. Yan, P. Dai, Y. Wang, X. Gu, L. Li, L. Cao and X. Zhao, In Situ Synthesis Strategy for Hierarchically Porous  $\text{Ni}_2\text{P}$  Polyhedrons from MOFs Templates with Enhanced Electrochemical Properties for Hydrogen Evolution, *ACS Applied Materials & Interfaces*, 2017, **9**, 11642-11650.
6. Y. Zhang, H. Hu, Z. Wang, B. Luo, W. Xing, L. Li, Z. Yan and L. Wang, Boosting the performance of hybrid supercapacitors through redox electrolyte-mediated capacity balancing, *Nano Energy*, 2020, **68**, 104226.
7. Y. Tang, H. Shen, J. Cheng, Z. Liang, C. Qu, H. Tabassum and R. Zou, Fabrication of Oxygen-Vacancy Abundant NiMn-Layered Double Hydroxides for Ultrahigh Capacity Supercapacitors, *Advanced Functional Materials*, 2020, **30**, 1908223.
8. G. Xiang, Y. Meng, G. Qu, J. Yin, B. Teng, Q. Wei and X. Xu, Dual-functional  $\text{NiCo}_2\text{S}_4$  polyhedral architecture with superior electrochemical performance for supercapacitors and lithium-ion batteries, *Science Bulletin*, 2020, **65**, 443-451.
9. L. Hou, Y. Shi, C. Wu, Y. Zhang, Y. Ma, X. Sun, J. Sun, X. Zhang and C. Yuan, Monodisperse Metallic  $\text{NiCoSe}_2$  Hollow Sub-Microspheres: Formation Process, Intrinsic Charge-Storage Mechanism, and Appealing Pseudocapacitance as Highly Conductive Electrode for Electrochemical Supercapacitors, *Advanced Functional Materials*, 2018, **28**, 1705921.
10. S. R. Ede, S. Anantharaj, K. T. Kumaran, S. Mishra and S. Kundu, One step synthesis of  $\text{Ni}/\text{Ni}(\text{OH})_2$  nano sheets (NSs) and their application in asymmetric supercapacitors, *RSC Advances*, 2017, **7**, 5898-5911.
11. S. He, Z. Li, J. Wang, P. Wen, J. Gao, L. Ma, Z. Yang and S. Yang, MOF-derived  $\text{Ni}_x\text{Co}_{1-x}(\text{OH})_2$  composite microspheres for high-performance supercapacitors, *RSC Advances*, 2016, **6**, 49478-49486.
12. R. Ramachandran, Y. Lan, Z.-X. Xu and F. Wang, Construction of NiCo-Layered

- Double Hydroxide Microspheres from Ni-MOFs for High-Performance Asymmetric Supercapacitors, *ACS Applied Energy Materials*, 2020, **3**, 6633-6643.
13. X. Li, H. Wu, A. M. Elshahawy, L. Wang, S. J. Pennycook, C. Guan and J. Wang, Cactus-Like NiCoP/NiCo-OH 3D Architecture with Tunable Composition for High-Performance Electrochemical Capacitors, *Advanced Functional Materials*, 2018, **28**, 1800036.
  14. W. Wang, N. Zhang, Z. Ye, Z. Hong and M. Zhi, Synthesis of 3D hierarchical porous Ni-Co layered double hydroxide/N-doped reduced graphene oxide composites for supercapacitor electrodes, *Inorganic Chemistry Frontiers*, 2019, **6**, 407-416.
